# Supplementary material
Source: PubMed Central journal article supplement (PMC1266142)
Supplement: pnas_0507777102_1.pdf [file pnas_0507777102_1.pdf]

**Table 2. Summary of constants used to estimate step edge free energies,  $\alpha$ , and kinetic coefficients,  $\beta$ , for quartz, feldspar, and kaolinite**

| Mineral                | Solution*                                     | Constants |         |                            |                  | Dislocation model (Eq. 12b) |                                                   | Nucleation model (Eq. 12a)                        |                                                       |
|------------------------|-----------------------------------------------|-----------|---------|----------------------------|------------------|-----------------------------|---------------------------------------------------|---------------------------------------------------|-------------------------------------------------------|
|                        |                                               | Temp, °C  | $h$ , Å | $\omega$ , cm <sup>3</sup> | $mh^\dagger$ , Å | $\beta$ , cm/s              | $\alpha_{\text{dislocation}}$ , mJ/m <sup>2</sup> | $\alpha_{\text{homogeneous}}$ , mJ/m <sup>2</sup> | $\alpha_{\text{defect assisted}}$ , mJ/m <sup>2</sup> |
| Quartz                 | H <sub>2</sub> O                              | 200       | 4.33    | $3.77 \times 10^{-23}$     | 4.91             | $\sim 1 \times 10^{-6}$     | $16.2 \pm 5$                                      | —                                                 | —                                                     |
| Quartz                 | 0.0167 M CaCl <sub>2</sub>                    | 200       | 4.33    | $3.77 \times 10^{-23}$     |                  | —                           | —                                                 | $79 \pm 14$                                       | $32 \pm 10$                                           |
| Quartz                 | 0.05 M NaCl                                   | 200       | 4.33    | $3.77 \times 10^{-23}$     |                  | —                           | —                                                 | $61 \pm 6$                                        | $18 \pm 8$                                            |
| Feldspar <sup>‡</sup>  | KCl/KOH, pH 9                                 | 150       | 7.22    | $1.80 \times 10^{-22}$     |                  | —                           | —                                                 | $30 \pm 4$                                        | $8 \pm 4$                                             |
| Kaolinite <sup>§</sup> | HClO <sub>4</sub> /NaOH, pH 3                 | 80        | 7.37    | $1.65 \times 10^{-22}$     | 7.37             | $\sim 2 \times 10^{-8}$     | $2.6 \pm 0.4$                                     | —                                                 | —                                                     |
| Kaolinite <sup>¶</sup> | HCl, pH 2                                     | 150       | 7.37    | $1.65 \times 10^{-22}$     |                  | —                           | —                                                 | $23 \pm 2$                                        | $4 \pm 2$                                             |
| Kaolinite <sup>¶</sup> | NH <sub>4</sub> Cl/NH <sub>4</sub> OH, pH 7.8 | 150       | 7.37    | $1.65 \times 10^{-22}$     |                  | —                           | —                                                 | $24 \pm 2$                                        | $7 \pm 3$                                             |

\*Note that the aqueous solutions also contain dissolved aqueous silica and (as applicable) stoichiometric amounts of aluminum.

<sup>†</sup>The Burgers vector,  $b = mh$ , is used to estimate the perimeter,  $P$ , in Eq. 12b by the relation  $2\pi r_h$ . Values of  $r_h$  for quartz and kaolinite are  $1.25b$  and  $2.5b$ , respectively (16). No value is reported for K-feldspar because only the dislocation model requires  $b$ .

<sup>‡</sup>Dissolution rate data from ref. 22 using  $\log K_{\text{sp}} = -15.24$  at 150°C.

<sup>§</sup>Dissolution rate data from ref. 6 using  $\log K_{\text{sp}} = 3.75$  for pH = 3,  $T = 80^\circ\text{C}$ .

<sup>¶</sup>Dissolution rate from ref. 23 using  $\log K_{\text{sp}} = -4.00$  (pH 2) and  $\log K_{\text{sp}} = -7.45$  (pH 7.8) at 150°C.
